# Supplementary material
Source: PubMed Central journal article supplement (PMC6868974)
Supplement: HBM-35-6077-s001.pdf [file HBM-35-6077-s001.pdf]

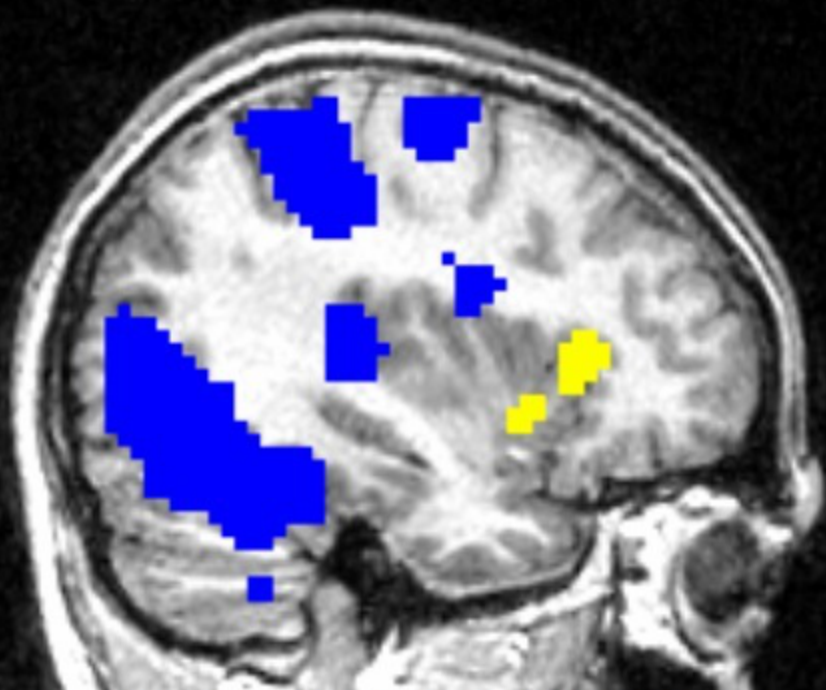

Anterior insula (yellow) and Digits vs Control contrast (blue)

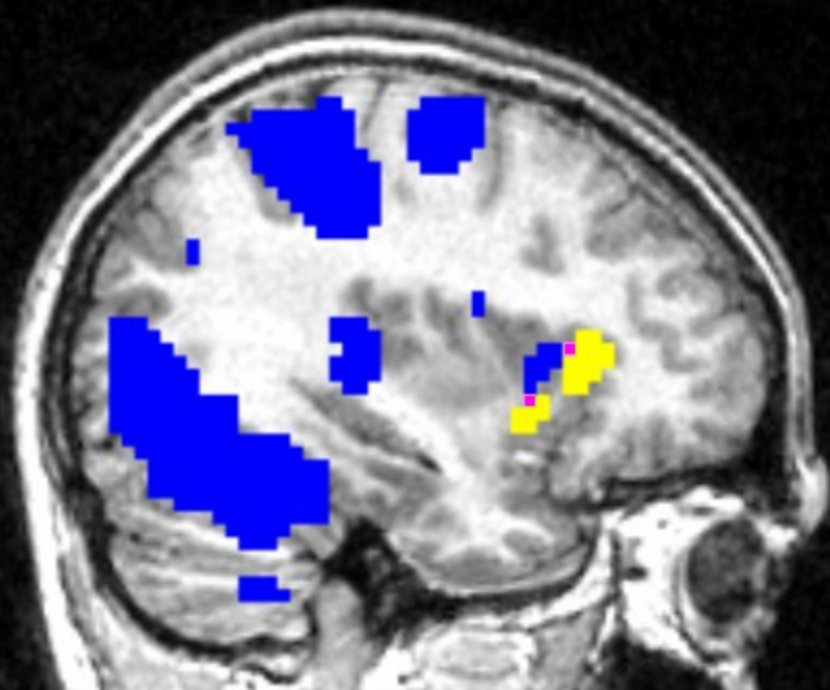

Anterior insula (yellow) and Letters vs Control contrast (blue). Common voxels in pink
